# Supplementary material for: One-pot synthesis of 1-butylpyrrolidine and its derivatives from aqueous ammonia and 1,4-butandiol over CuNiPd/ZSM-5 catalysts
Source: Royal Society of Chemistry journal article supplement (doi:10.1039/d0nj02224a), 2020-01-01
Supplement: d0nj02224a1.pdf [file d0nj02224a1.pdf]

## Supplementary Information:

New Journal of Chemistry

# One-pot synthesis of 1-butylpyrrolidine and its derivatives from aqueous ammonia and 1,4-butanediol over CuNiPd/ZSM-5 catalyst

Yan Long<sup>a,b</sup>, Shimin Liu<sup>a,\*</sup>, Xiangyuan Ma<sup>a</sup>, Liujin Lu<sup>a</sup>, Yude He<sup>a</sup>, Youquan Deng<sup>a,\*</sup>

### Catalyst characterization:

The metal contents were analyzed by using graphite furnace atomic absorption spectroscopy (GF-AAS, contraAA700, Germany).

X-ray diffraction (XRD) was measured on a Siemens D/max-RB powder X-ray diffractometer. Diffraction patterns were recorded with Cu K $\alpha$  radiation (40 mA, 40 kV) over a 2 $\theta$  range of 5° to 90° and a position-sensitive detector using a step size of 0.01° and a step time of 0.15 s.

Surface analysis of the catalysts was performed by X-ray photoelectron spectroscopy (XPS) on a VG ESCALAB210 spectrometer using Mg K $\alpha$  radiation at a pass energy of 20 eV. The energy scale was calibrated and corrected for charging using the C 1s (285.0 eV) line as the binding energy (BE) reference.

Transmission electron microscope (TEM) analysis was carried out using a TF20 field emission transmission electron microscope operating at 300 kV. Single-particle EDX mapping analysis was performed using a TF20 field emission TEM in the STEM mode.

### General procedures for the preparation of 3Cu-3Ni-0.2Pd/ZSM-5:

The 3%Cu-3%Ni-0.2Pd/ZSM-5 catalyst was prepared by incipient wetness method using Cu(NO<sub>3</sub>)<sub>2</sub>·3H<sub>2</sub>O, Ni(NO<sub>3</sub>)<sub>2</sub>·6H<sub>2</sub>O and H<sub>2</sub>PdCl<sub>4</sub> (Sinopharm Chemical Reagent Co., Ltd, China) aqueous solution ([Pd] 0.1g/mL) as starting materials. 1.14g Cu(NO<sub>3</sub>)<sub>2</sub>·3H<sub>2</sub>O (0.3g Cu) and 1.5g Ni(NO<sub>3</sub>)<sub>2</sub>·6H<sub>2</sub>O (0.3g Ni) dissolved in 3mL water, then 0.2ml H<sub>2</sub>PdCl<sub>4</sub> aqueous solution was added, 10g HZSM-5 zeolite (Si/Al ratio of 80, surface area of 360 m<sup>2</sup>/g, supplied by the catalyst plant of NanKai University, China) with continuous stirring at room temperature. After 2h stirring and 2h aging, the resulted precipitate was dried at 110 °C for 12h. Then, the precursors were calcined at 500 °C for 3h in air. Then, the obtained catalyst precursor was reduced at 300 °C under hydrogen atmosphere for 3h. The catalyst was denoted as 3Cu-3Ni-0.2Pd/ZSM-5. Other catalysts were prepared via similar method, and the carrier USY (Si/Al ratio of 5.4, surface area of 700 m<sup>2</sup>/g) Beta (Si/Al ratio of 40, surface area of 680 m<sup>2</sup>/g), HZSM-5 (Si/Al ratio of 25, surface area of 340 m<sup>2</sup>/g) and HZSM-5 (Si/Al ratio of 300, surface area of 370 m<sup>2</sup>/g) zeolites were also purchased from the catalyst plant of NanKai University, China.

### Synthesis of 1-BP:

The catalytic reactions were carried out in a 100 ml stainless steel autoclave with a magnetic stirrer. In a typical process, BDO 18g (0.2 mol), aqueous NH<sub>3</sub> 6.8g (0.1 mol, 25 wt% solution) and catalyst (1.8 g) were charged in the autoclave, which was then filled with H<sub>2</sub> at 4 MPa pressure. The reactor was heated to 300 °C and magnetically stirred constantly during the reaction, and the final pressure was 10 Mpa. After reaction, the qualitative and quantitative analyses of the resulting liquid mixture were conducted with GC-MS (Agilent 6890/5973) and GC (Agilent 7890) equipped with a SE-54 capillary column and a FID detector. The GC-MS chromatogram of the products under optimization conditions, the scan and standard mass spectra of 1-butylpyrrolidine were illustrated in Fig. S1.

**Table S1** The comparison of different routes for synthesis of 1-BP

| Entry            | Route                                                                               | Catalyst                                            | Yield            | Ref.             |
|------------------|-------------------------------------------------------------------------------------|-----------------------------------------------------|------------------|------------------|
| 1 <sup>a,b</sup> | 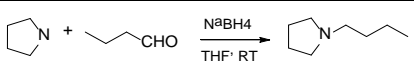   | Silica gel supported H <sub>2</sub> SO <sub>4</sub> | 90% <sup>d</sup> | 1                |
| 2 <sup>a</sup>   |  | RuCl <sub>3</sub>                                   | 80% <sup>d</sup> | 2                |
| 3 <sup>a,b</sup> |  | -                                                   | 62% <sup>d</sup> | 3                |
| 4 <sup>b</sup>   |  | Hydrotalcite                                        | 82% <sup>e</sup> | 4                |
| 5 <sup>a</sup>   |  | RhH(PPh <sub>3</sub> ) <sub>4</sub>                 | 56% <sup>d</sup> | 5                |
| 6                |  | RuCl <sub>3</sub>                                   | 36% <sup>d</sup> | 2                |
| 7 <sup>c</sup>   |  | Reduced, fused iron                                 | 38% <sup>e</sup> | 6                |
| 8                |  | CuNiPd/ZSM-5                                        | 76% <sup>e</sup> | <b>This work</b> |

<sup>a</sup> Involving relatively expensive raw materials

<sup>b</sup> Using relatively toxic reactants or yielding waste acid (or salt)

<sup>c</sup> 1-BP just is one of the products, and not the target product

<sup>d</sup> Isolated yield

<sup>e</sup> GC yield

**Table S2** The contents of Cu, Ni and Pd measured by AAS

| catalyst             | Content wt% |      |      |
|----------------------|-------------|------|------|
|                      | Cu          | Ni   | Pd   |
| 3Cu-3Ni/ZSM-5        | 2.91        | 2.88 |      |
| 3Cu-3Ni-0.2Pd/ZSM-5  | 2.92        | 2.86 | 0.19 |
| 3Cu-3Ni-0.2Pd/ZSM-5* | 1.76        | 2.68 | 0.18 |

\* 2<sup>nd</sup> run**Table S3** XPS peak table of 3% Cu-3% Ni-0.2/ZSM-5

| Name | Start BE | Peak BE | End BE | Atomic % |
|------|----------|---------|--------|----------|
| C1s  | 298.88   | 284.78  | 280.08 | 93.16    |
| Cu2p | 970.88   | 932.83  | 926.08 | 3.38     |
| Ni2p | 890.88   | 855.76  | 846.08 | 3.19     |
| Pd3d | 352.08   | 336.15  | 330.28 | 0.26     |

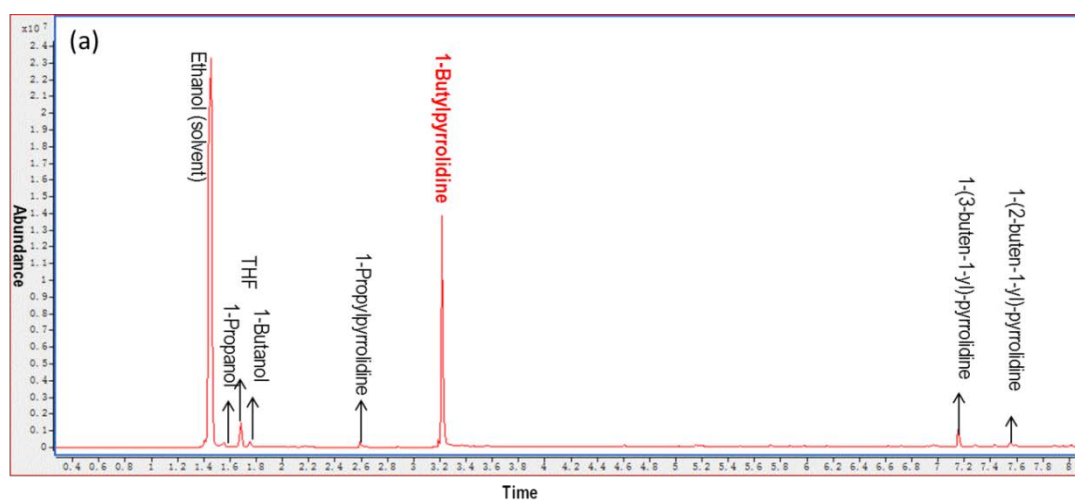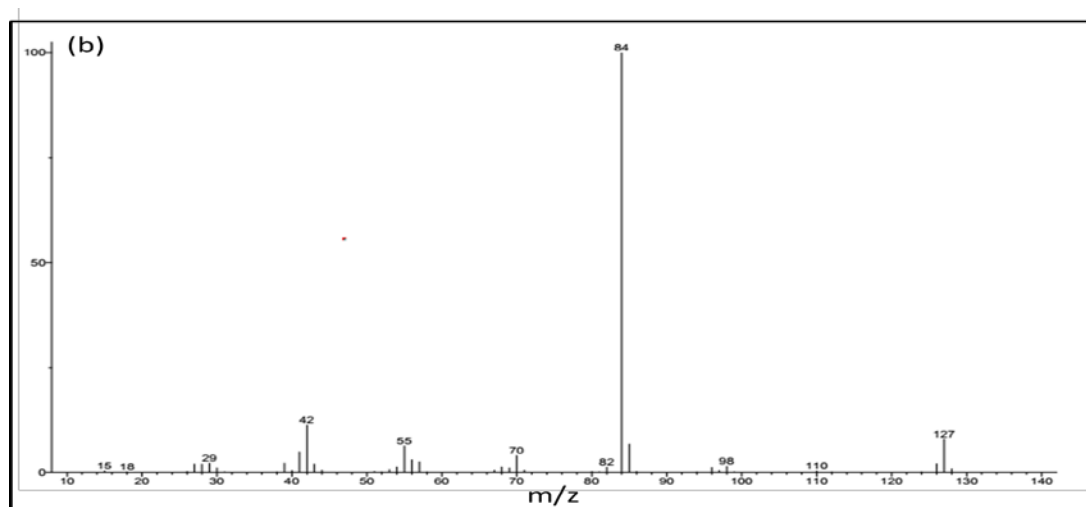

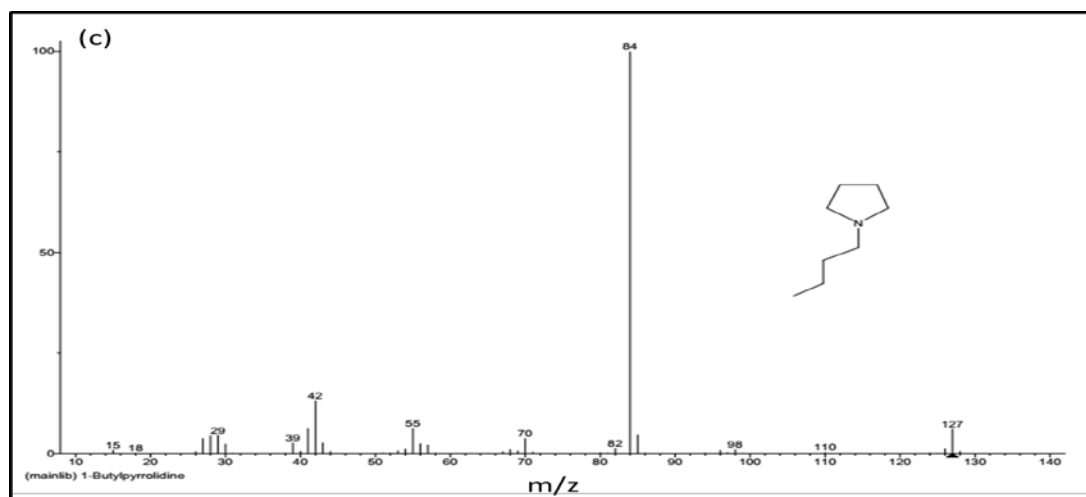

Fig. S1 (a) GC-MS chromatogram of the products under optimization conditions, (b) scan mass spectrum of 1-butylpyrrolidine, (c) standard mass spectrum of 1-butylpyrrolidine

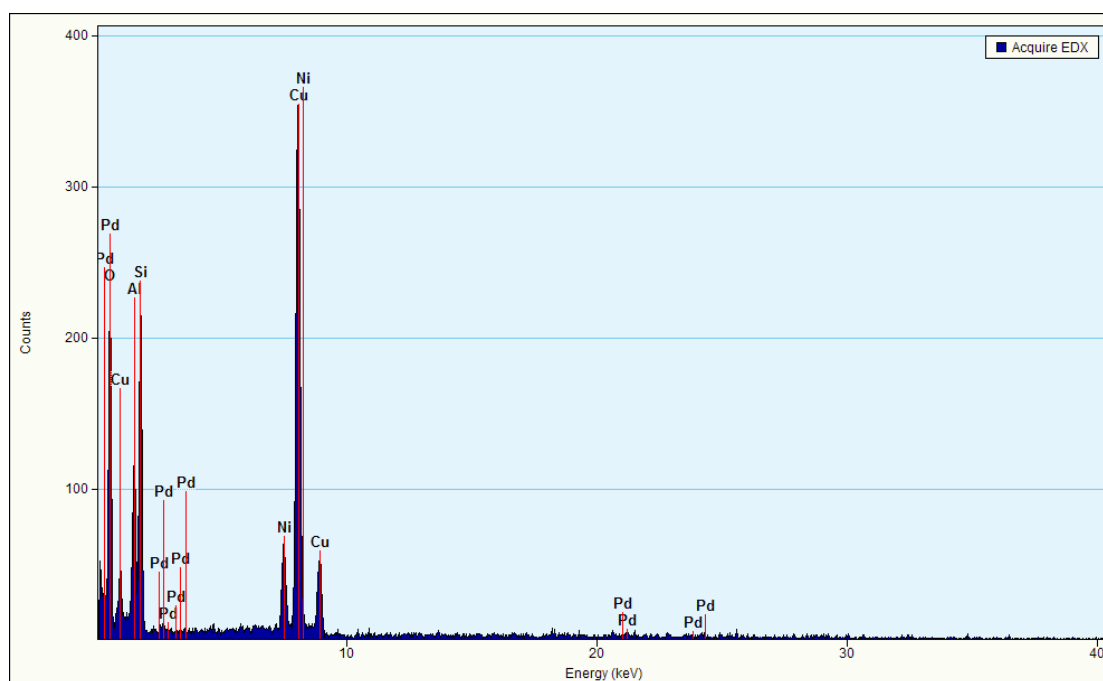

Fig. S2 the EDX pattern of 3Cu-3Ni-0.2Pd/ZSM-5

## References

1. H. Alinezhad, M. Tajbakhsh and M. Zare, *Synth. Commun.*, 2009, **39**, 2907-2916.
2. G. Bitsi, E. Schleiffer, F. Antoni and G. Jenner, *J. Organomet. Chem.*, 1989, **373**, 343-352.
3. X. Li, Z.Zeng, S. Garg, B. Twamley, J. M. Shreeve, *Eur. J. Inorg. Chem.* 2008, 3353-3358.
4. M. Dixit, M. Mishra, P. A. Joshi and D. O. Shah, *Bull. Korean Chem. Soc.*, 2012, **33**,

1457-1464.

5. R. Grigg, T. R. B. Mitchell, S. Sutthivaiyakit, N. Tongpenyai, *J.C.S. Chem. Comm.*, 1981, **12**, 611-612.
6. G. Kliger, O. Lesik, E. Marchevskaya, A. Mikaya, V. Zaikin, L. Glebov and S. Loktev, *Chem. Heterocycl. Compd.*(Engl. Transl.);(United States), 1987, **23**, 161-164.
